# Supplementary material for: Temperature variations in pharmaceutical storage facilities and knowledge, attitudes, and practices of personnel on proper storage conditions for medicines in southern Malawi
Source: PubMed Central journal article supplement (PMC10556513; doi:10.3389/fpubh.2023.1209903), 2023-09-22
Supplement: Data_Sheet_1.pdf [file Data_Sheet_1.pdf]

**ASSESSING KNOWLEDGE, ATTITUDE AND PRACTICES OF PHARMACY PERSONNEL ON ADHERENCE TO PROPER STORAGE CONDITIONS FOR MEDICINES IN TERMS OF TEMPERATURE VARIATION IN ZOMBA, MACHINGA AND NSANJE**

Participant's code number .....

Tel.....

Facility code.....

1. Gender

Male .....

Female.....

2. Age.....

3. Working experience (years).....

4. Educational level

JCE  MSCE  Professional Certificate  Diploma  Bachelor's Degree

Postgraduate Degree

5. Position (e.g. Pharmacy Technician): .....

6. At what temperature ranges do you store the following drug formulations in your pharmacy/drugstore...

(a) Refrigerated (Heat sensitive drugs) .....Don't Know

(b) Oral solid dosage forms..... Don't Know

(c) Topical semi-solid dosage forms..... Don't Know

7. Do you have air-conditioners in the pharmacy/medicine store?

Yes  No

8. Do you have alternative source of energy (e.g. gen set or solar)

Yes and is functional  Yes but not functional  No

9. Do you have thermometers for monitoring temperature in the pharmacy/ medicine store?

Yes  No

10. Are available thermometers functional?

Yes  No

11. How frequent do you record temperatures in the pharmacy/medicine store?

Do not record  Once a day  Twice a day  Once a week  Once a month

12. What are the effects of not adhering to the storage temperatures for medicines and medical supplies

Don't know  Nothing can happen if the medicine is before expiry  Degradation

13. When transporting medicines, what measures do you use for controlling temperature?

No control  Cooler boxes  Air-conditioned vehicles

### **Guide questions for semi-structured interview**

1. What Challenges do you encounter in maintaining proper storage conditions?
2. How do you address the challenges encountered in maintaining proper storage conditions for medicines?
3. What quality systems do you have at the facility?
4. Share any experiences of observed negative effects as a result of storage conditions in the pharmacy/medicine store?
5. Are there any measures being established by stakeholders to improve the quality of pharmaceutical storage at the facility?
